# Supplementary material for: Contrasting biological potency of particulate matter collected at sites impacted by distinct industrial sources
Source: PubMed Central journal article supplement (PMC5134226; doi:10.1186/s12989-016-0176-y), 2016-12-01

A) Water Soluble Elements

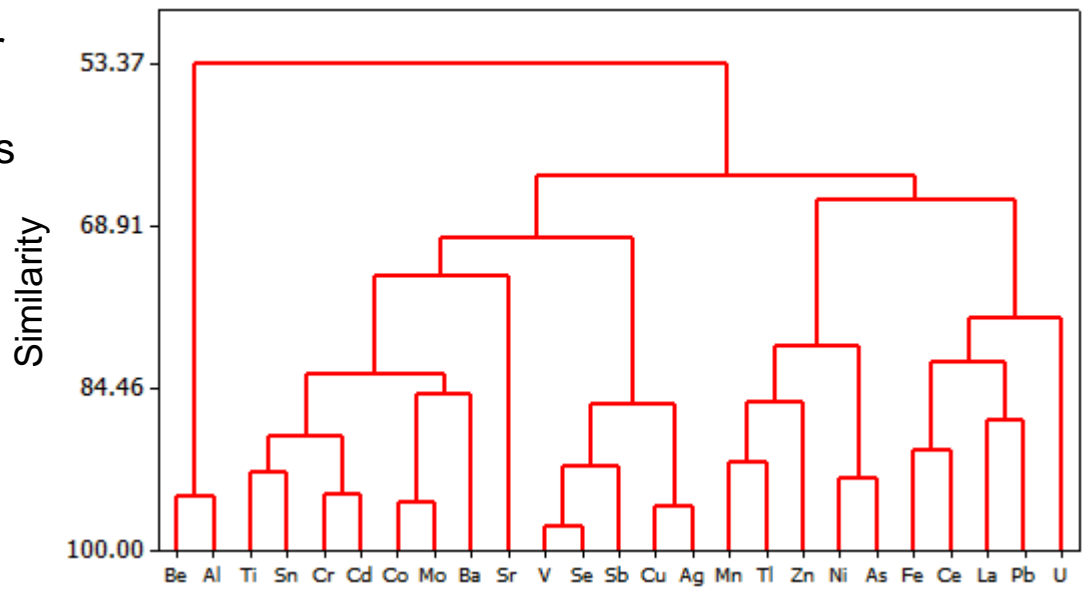

B) Non-water Soluble Elements

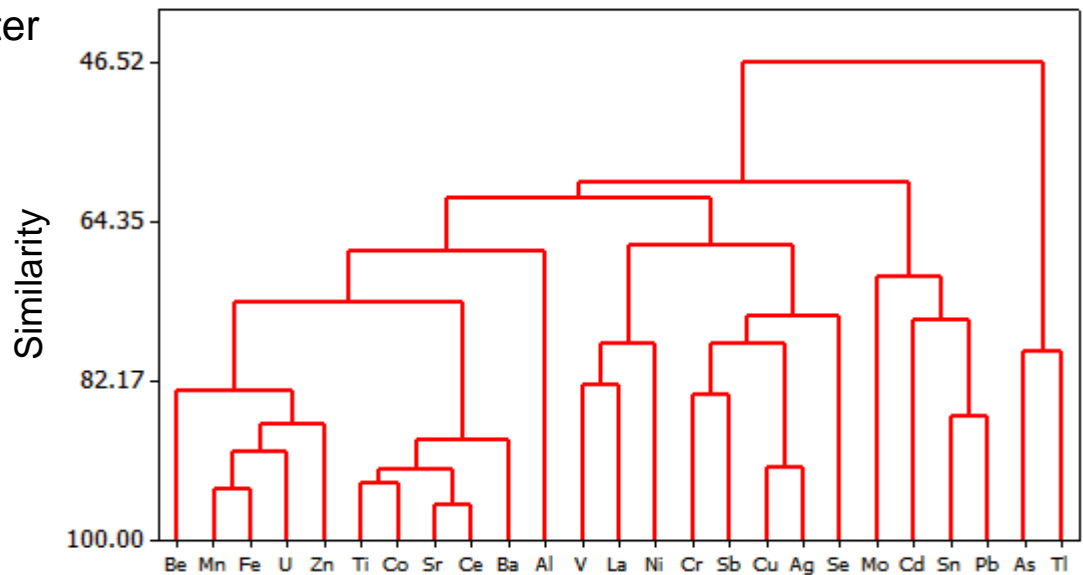

C) Total Elements

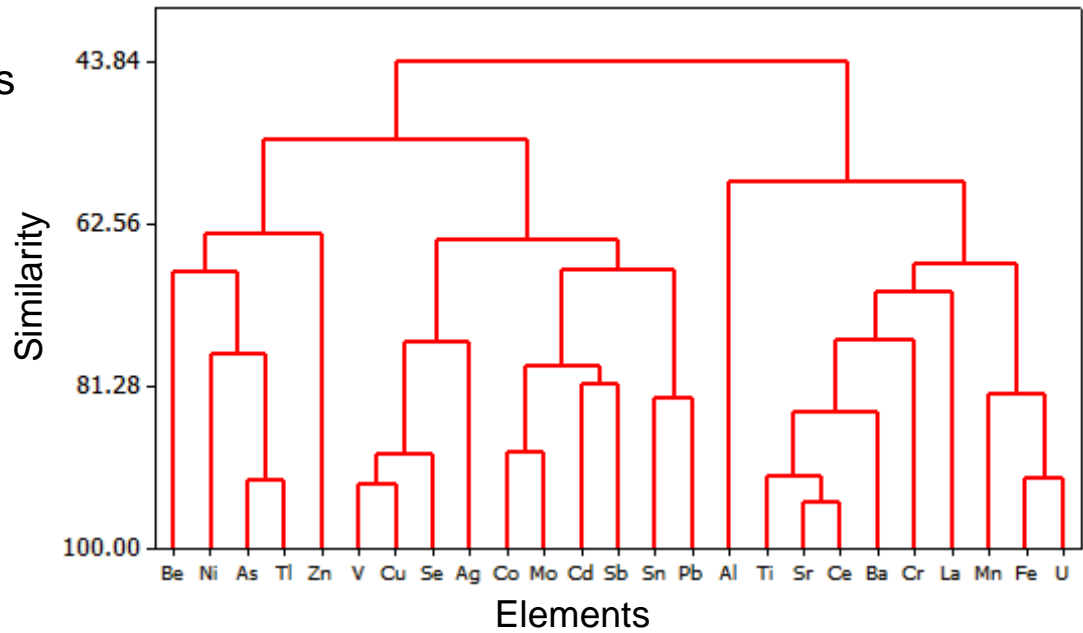

Supplement: 12989_2016_176_MOESM4_ESM.pdf [file 12989_2016_176_MOESM4_ESM.pdf]
