# Supplementary material for: Contrasting biological potency of particulate matter collected at sites impacted by distinct industrial sources
Source: PubMed Central journal article supplement (PMC5134226; doi:10.1186/s12989-016-0176-y), 2016-12-01
Supplement: 12989_2016_176_MOESM11_ESM.pdf [file 12989_2016_176_MOESM11_ESM.pdf]

| Size                  | Total PAHs |              |              |            |       |  | Volatile PAHs |       |              |            |       |  | Semi-volatile PAHs |              |              |            |       |        | Particle-associated PAHs |       |       |            |       |              | Endotoxin    |       |               |            |  |  |
|-----------------------|------------|--------------|--------------|------------|-------|--|---------------|-------|--------------|------------|-------|--|--------------------|--------------|--------------|------------|-------|--------|--------------------------|-------|-------|------------|-------|--------------|--------------|-------|---------------|------------|--|--|
|                       | J774 cells |              |              | A549 cells |       |  | J774 cells    |       |              | A549 cells |       |  | J774 cells         |              |              | A549 cells |       |        | J774 cells               |       |       | A549 cells |       |              | J774 cells   |       |               | A549 cells |  |  |
|                       | AB         | LDH          | Inflam. Pot. | AB         | LDH   |  | AB            | LDH   | Inflam. Pot. | AB         | LDH   |  | AB                 | LDH          | Inflam. Pot. | AB         | LDH   |        | AB                       | LDH   |       | AB         | LDH   | Inflam. Pot. | AB           | LDH   |               |            |  |  |
| UFP                   | N/A        | N/A          | N/A          | N/A        | N/A   |  | N/A           | N/A   | N/A          | N/A        | N/A   |  | N/A                | N/A          | N/A          | N/A        | N/A   |        | N/A                      | N/A   |       | -0.26      | 0.39  | 0.42         | 0.44         | 0.17  |               |            |  |  |
| PM <sub>0.1-2.5</sub> | -0.29      | 0.74         | -0.07        | 0.26       | -0.53 |  | 0.31          | 0.05  | 0.86**       | 0.38       | 0.16  |  | -0.3               | 0.63         | -0.5         | 0.23       | -0.53 | -0.53  | 0.81**                   | -0.41 | -0.01 | -0.62      | -0.44 | 0.44         | 0.33         | -0.22 | <b>-0.90*</b> |            |  |  |
| PM <sub>2.5-10</sub>  | -0.38      | 0.47         | -0.07        | -0.11      | -0.17 |  | 0.22          | 0.01  | 0.56         | 0.21       | 0.72  |  | -0.38              | 0.42         | -0.13        | -0.14      | -0.24 | -0.39  | 0.42                     | -0.14 | -0.14 | -0.27      | -0.63 | 0.69         | <b>0.94*</b> | -0.47 | 0.79          |            |  |  |
| PM <sub>&gt;10</sub>  | -0.7       | 0.81**       | -0.42        | -0.04      | -0.6  |  | 0.55          | -0.71 | -0.73        | -0.25      | 0.57  |  | -0.82**            | <b>0.92*</b> | -0.13        | -0.01      | -0.66 | -0.55  | 0.85**                   | -0.38 | 0.21  | -0.76      | -0.65 | 0.44         | 0.64         | -0.28 | 0.15          |            |  |  |
| All                   | -0.19      | <b>0.52*</b> | 0.01         | -0.0001    | 0.03  |  | 0.4           | -0.2  | 0.37         | 0.2        | 0.5** |  | -0.17              | 0.46**       | 0.02         | 0.01       | 0.01  | -0.5** | <b>0.63*</b>             | -0.29 | -0.19 | -0.33      | -0.33 | <b>0.56*</b> | <b>0.85*</b> | -0.29 | <b>0.71*</b>  |            |  |  |

\*p < 0.05

\*\*p<0.1
